# Supplementary material
Source: PubMed Central journal article supplement (PMC4970685)

**A**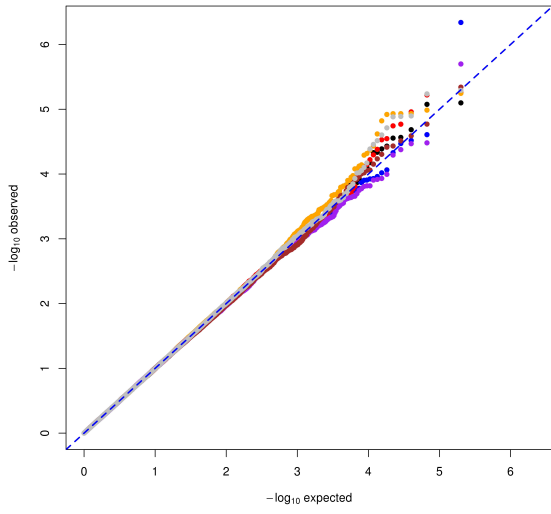**B**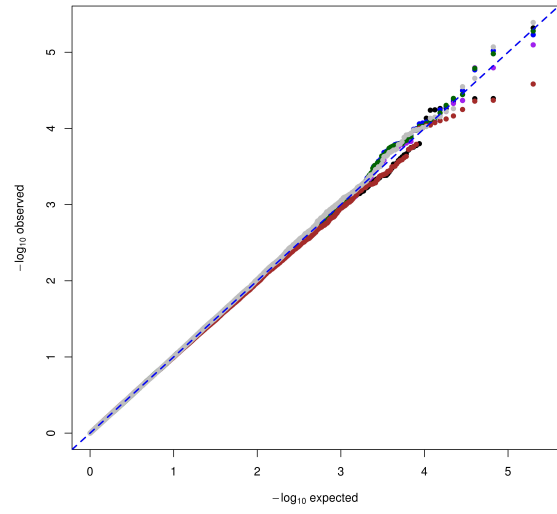**C**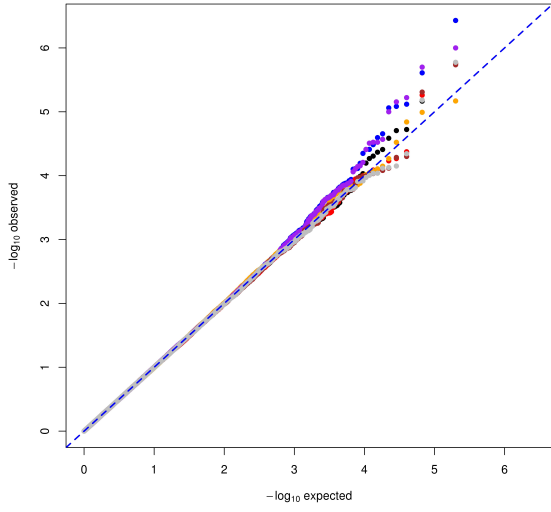**D**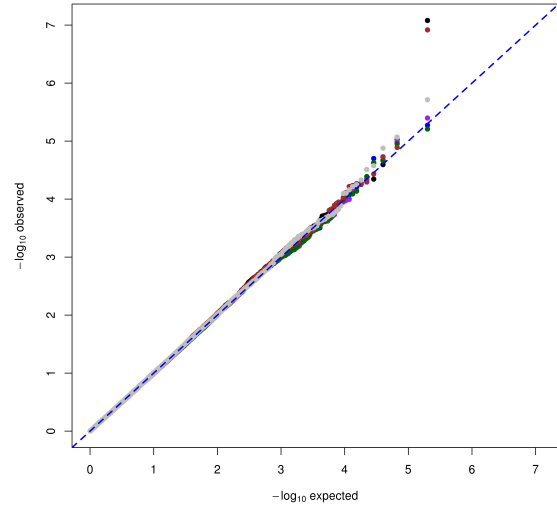**E**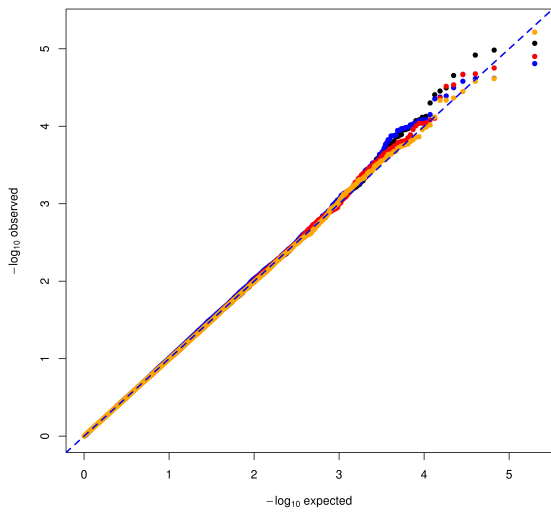**F**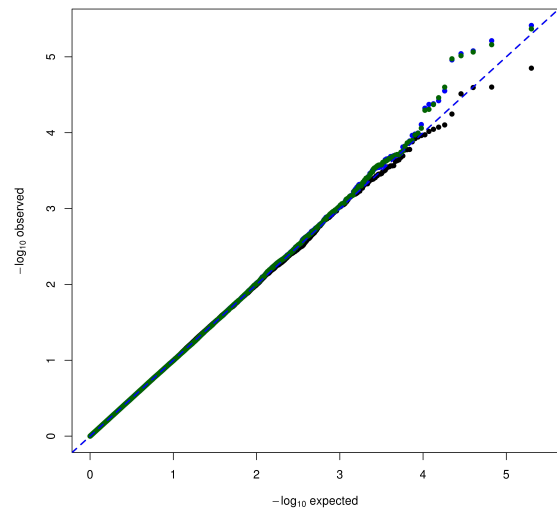

Supplement: ejhg2015270x1.pdf [file ejhg2015270x1.pdf]

**A**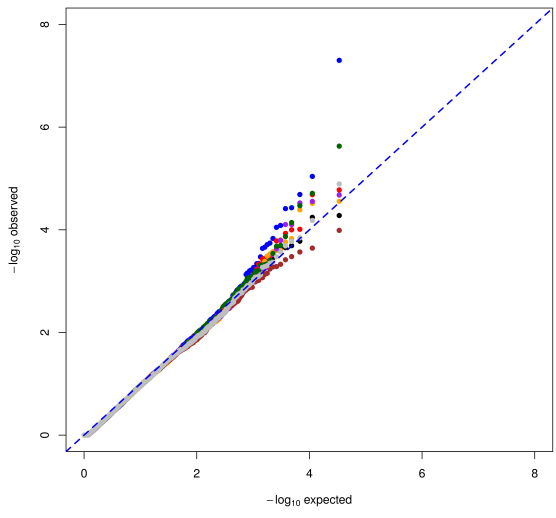**B**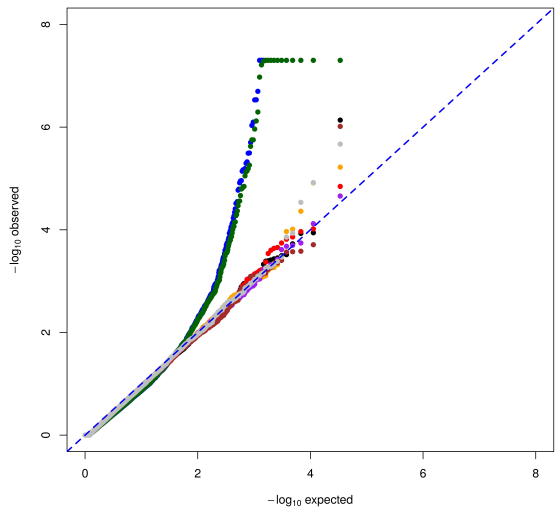**C**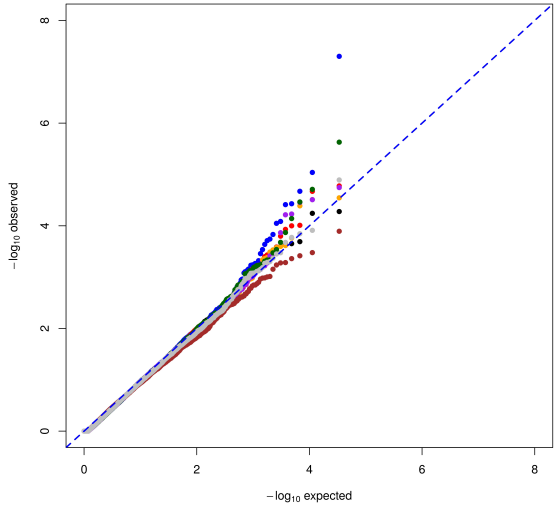**D**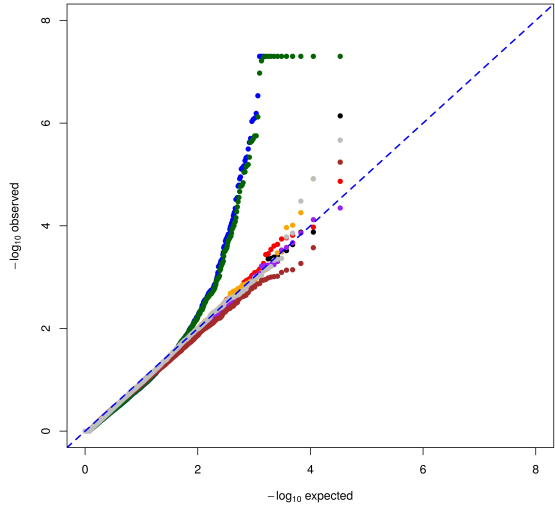**E**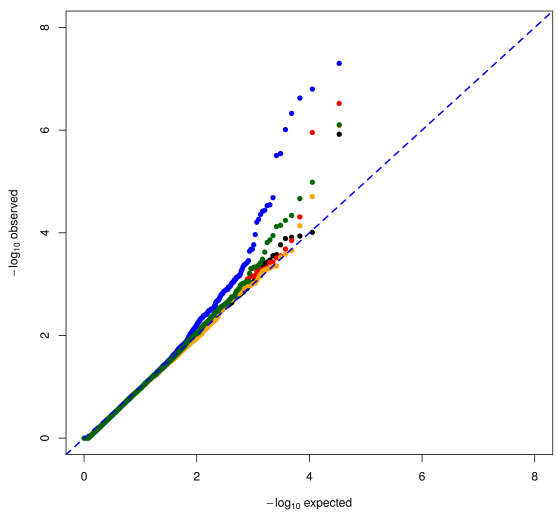**F**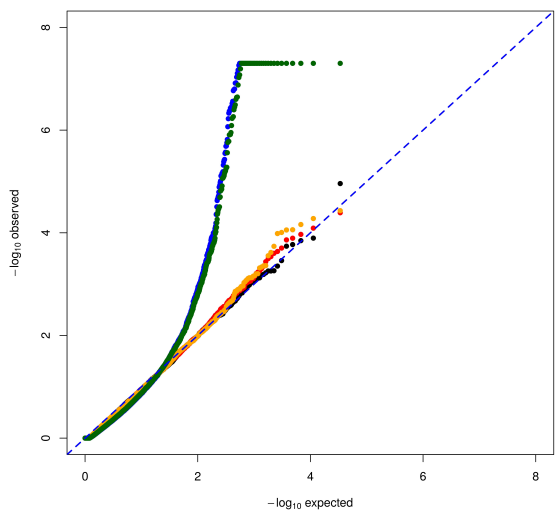

Supplement: ejhg2015270x10.pdf [file ejhg2015270x10.pdf]

A

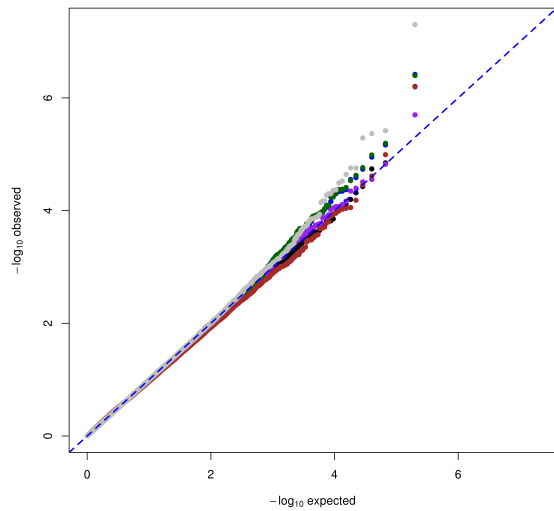

B

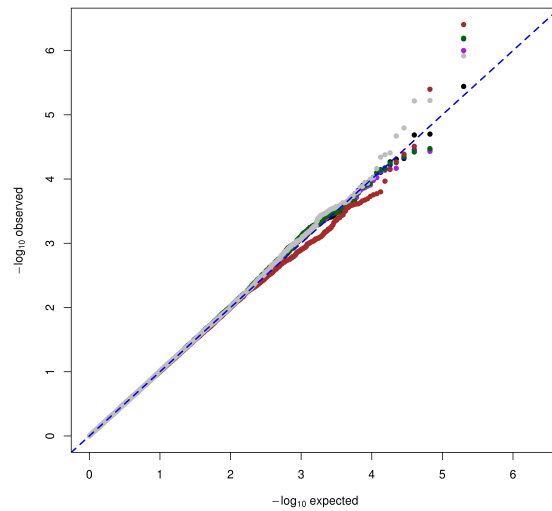

C

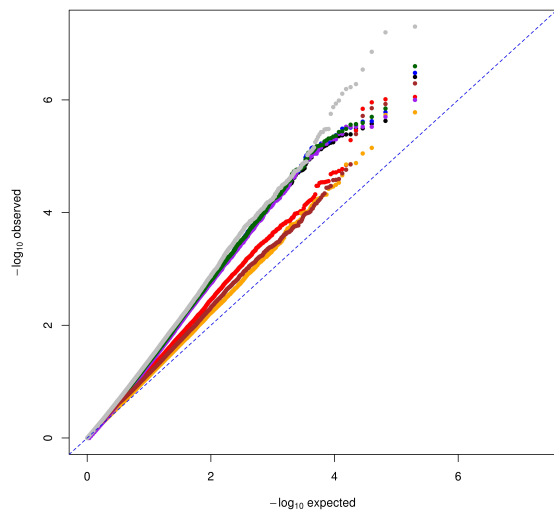

D

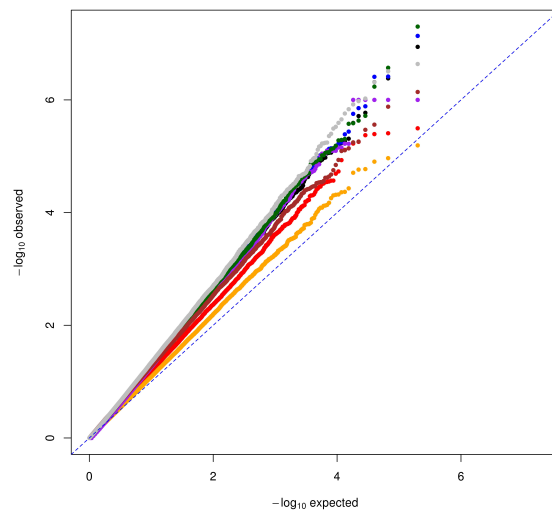

Supplement: ejhg2015270x2.pdf [file ejhg2015270x2.pdf]

A

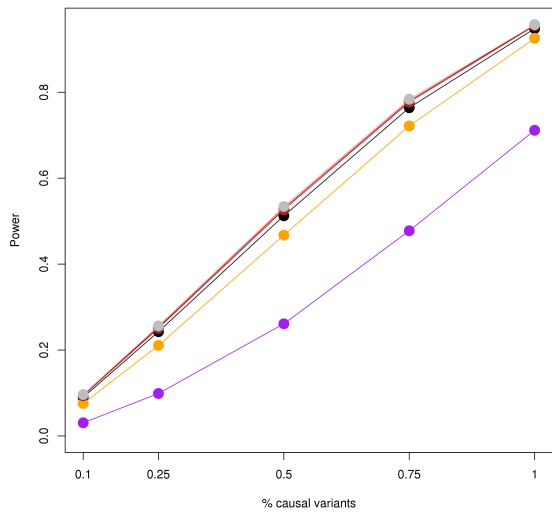

B

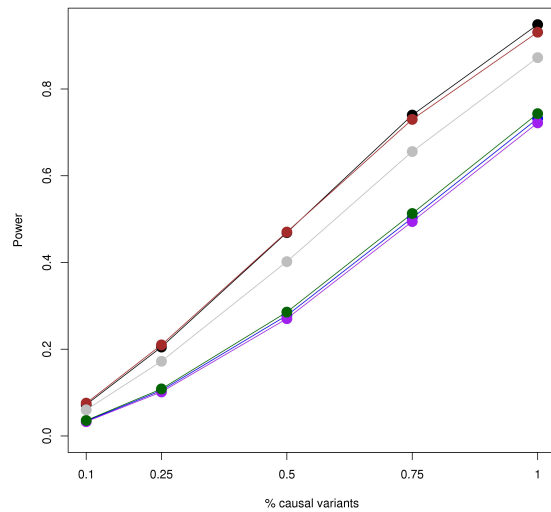

C

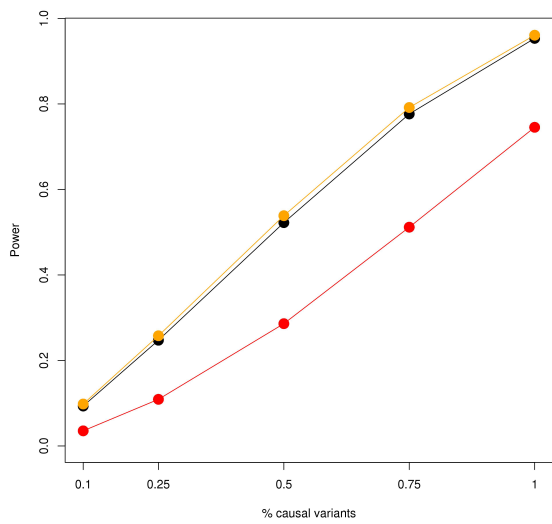

D

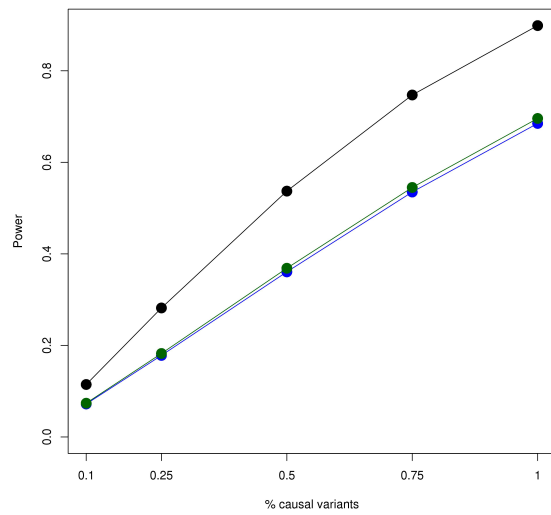

Supplement: ejhg2015270x3.pdf [file ejhg2015270x3.pdf]

A

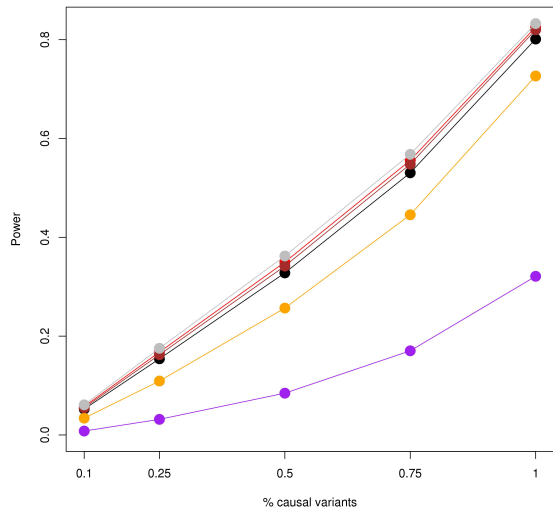

B

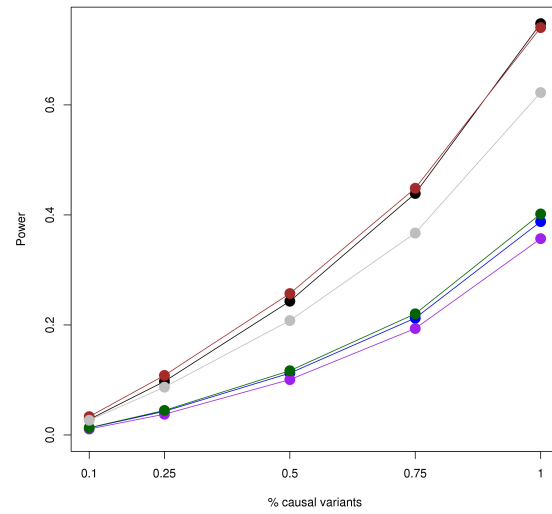

C

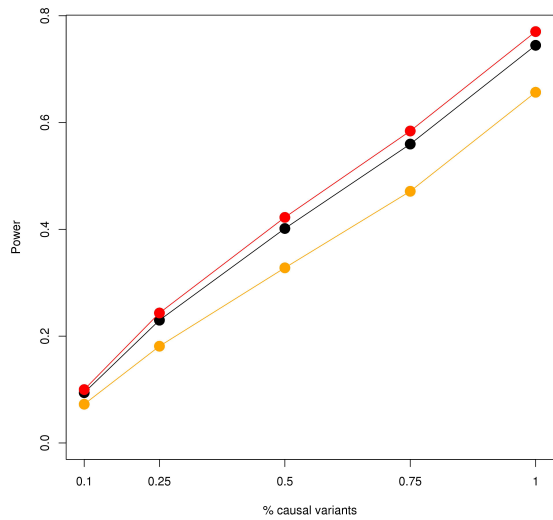

D

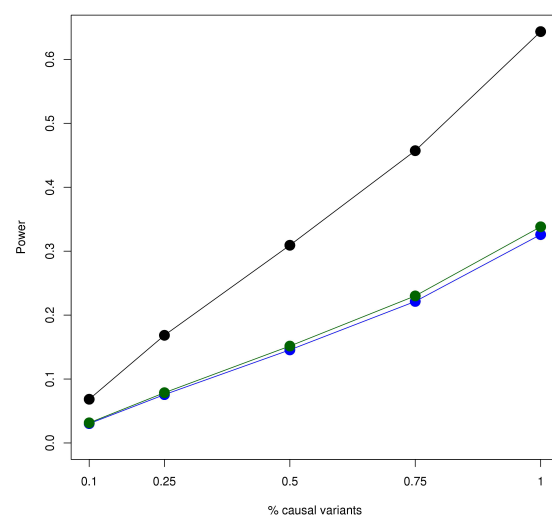

Supplement: ejhg2015270x4.pdf [file ejhg2015270x4.pdf]

A

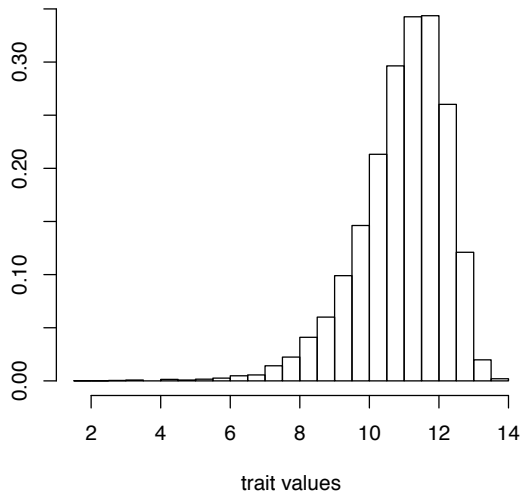

B

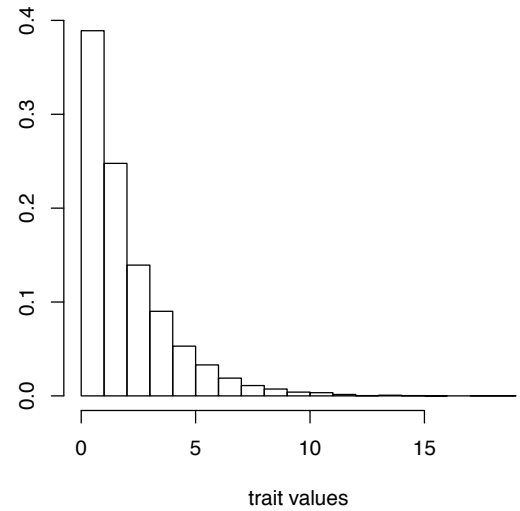

C

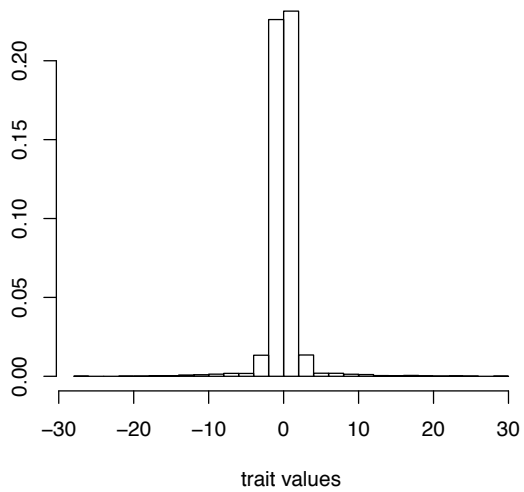

D

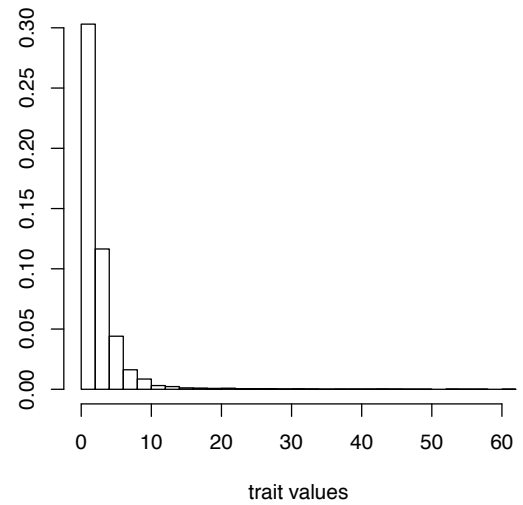

Supplement: ejhg2015270x5.pdf [file ejhg2015270x5.pdf]

A

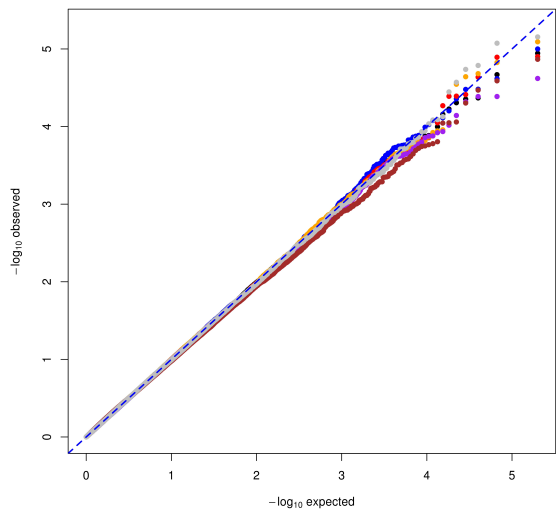

B

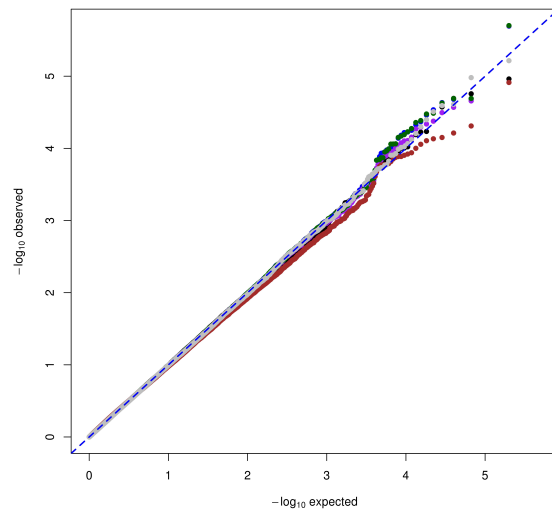

C

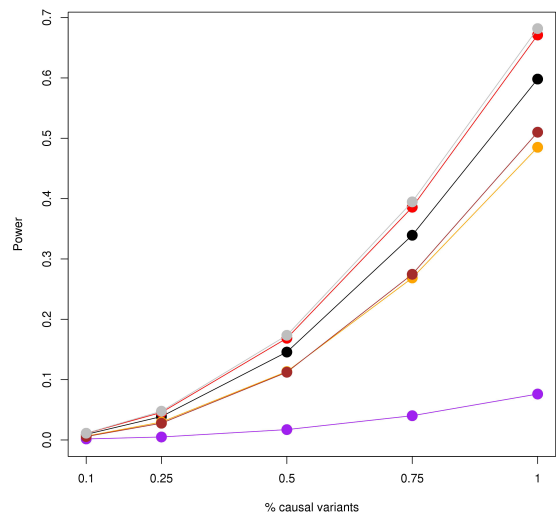

D

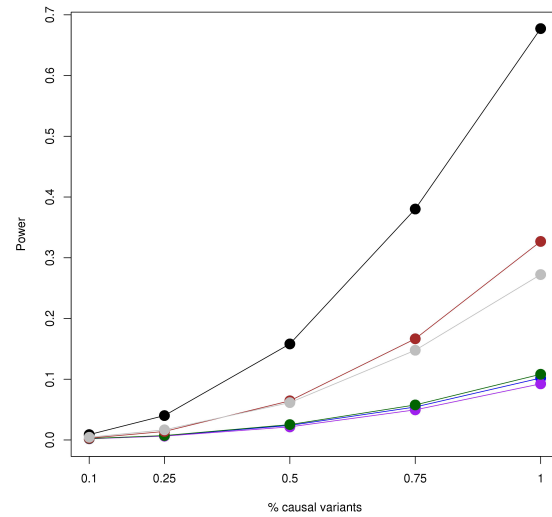

Supplement: ejhg2015270x6.pdf [file ejhg2015270x6.pdf]

**A**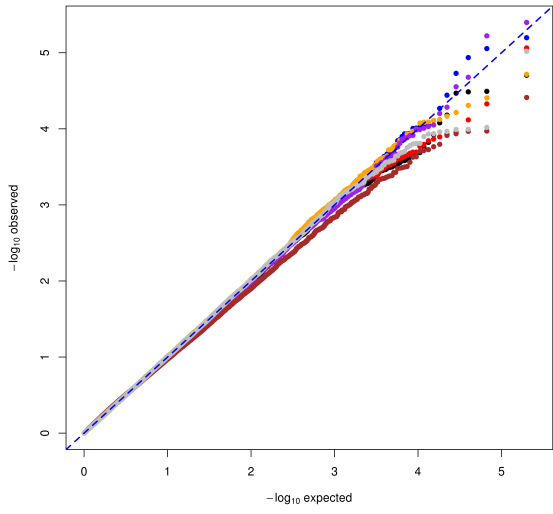**B**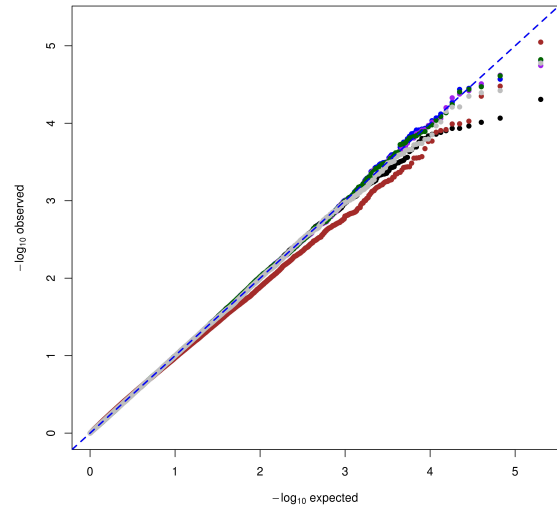**C**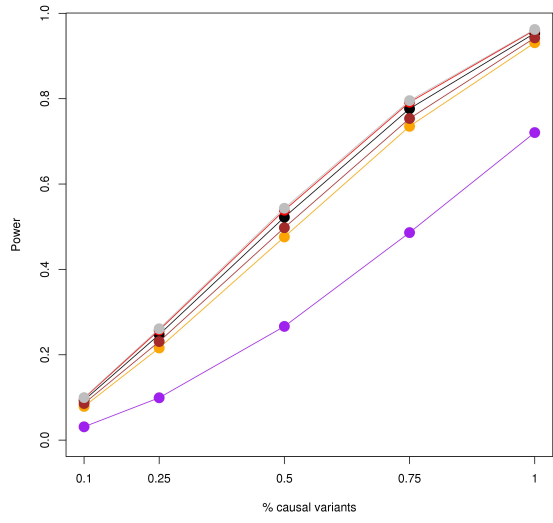**D**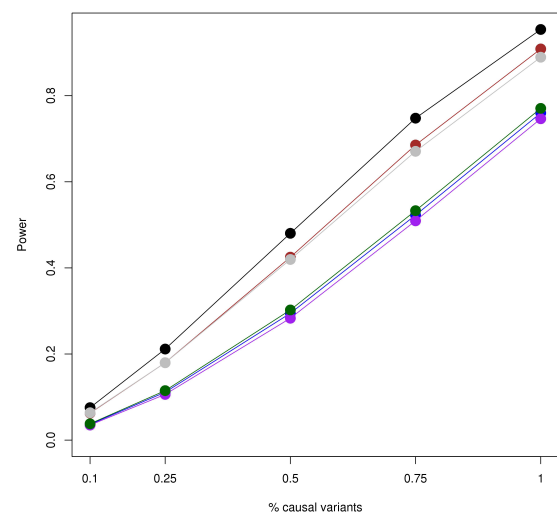**E**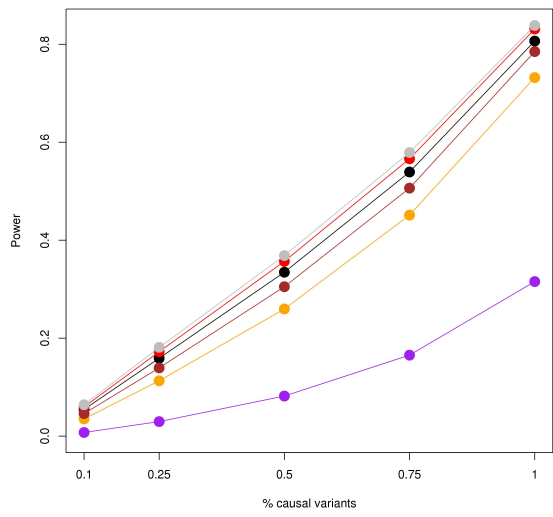**F**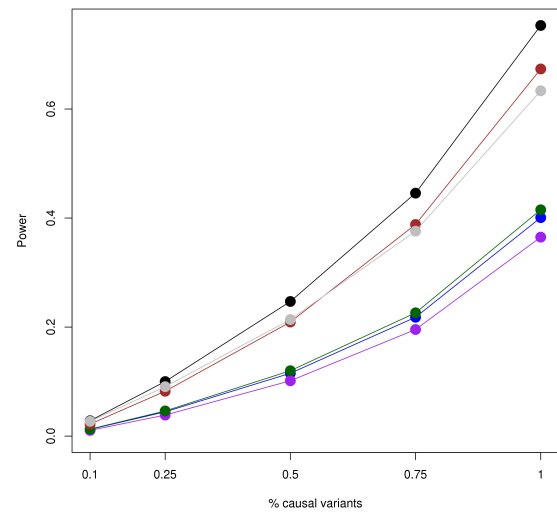

Supplement: ejhg2015270x7.pdf [file ejhg2015270x7.pdf]

A

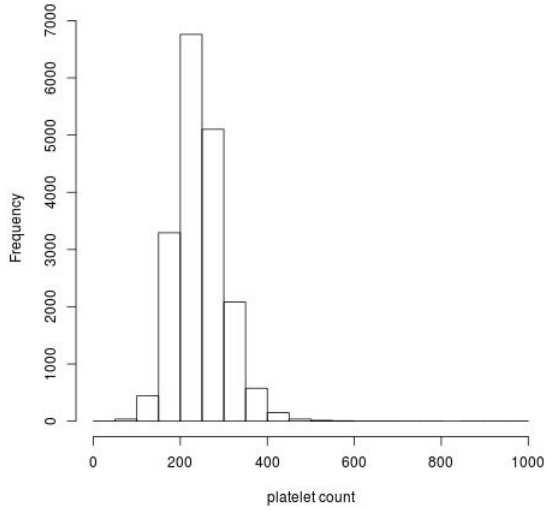

B

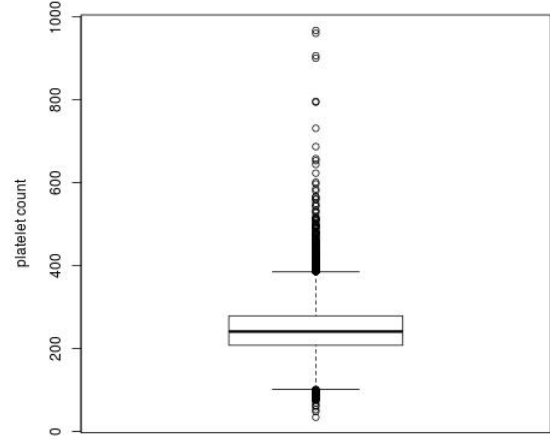

C

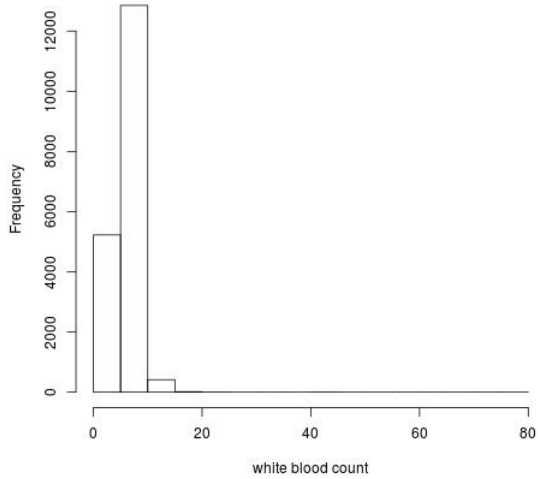

D

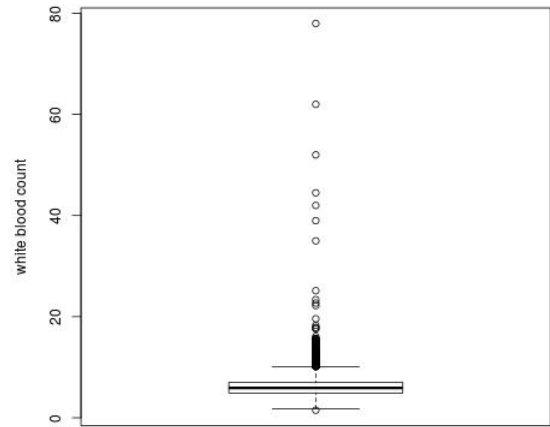

Supplement: ejhg2015270x8.pdf [file ejhg2015270x8.pdf]

A

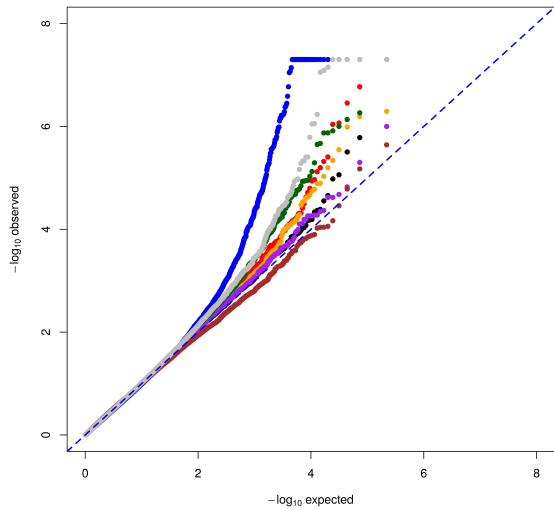

B

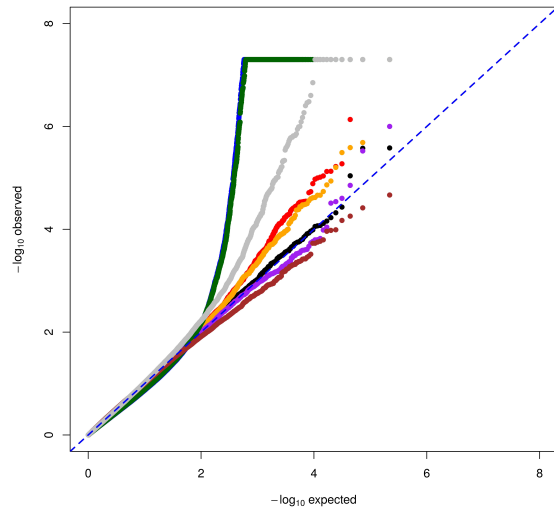

Supplement: ejhg2015270x9.pdf [file ejhg2015270x9.pdf]
